# Supplementary material
Source: publisher figshare collection journal article supplement (https://gsajournals.figshare.com/ndownloader/files/14961671)
Supplement: Supplementary file 1 [file 14961671]

**Table S1. *C. elegans* strains used in this study**

| **Strain** | **Genotype** | **Reference** |
| --- | --- | --- |
| N2 | Wild-type | (Brenner, 1974) |
| MAS39 | *rsa-1(or598) I* | (Lange et al., 2012) |
| MAS231 | *rsa-1(or598) ska-1(abc17) I* | (this study) |
| MAS235 | *rsa-1(or598) ska-1(abc25) I* | (this study) |
| MAS293 | *rsa-1(or598) I; ska-3(abc60) III* | (this study) |
| MAS23 | *dpy-5(e61) rsa-1(or598)* I | (this study) |
| MAS40 | *rsa-1(or598)* I; *bli-2(e768)* II; *unc-32(e189)* III | (this study) |
| MAS24 | *rsa-1(or598)* I; *unc-5(e53)* IV; *dpy-11(e244)* V; *lon-2(e678)* X | (this study) |
| MAS274 | *rsa-1(or598)* I; *dpy-1(e1) unc-119(ed3)* III | (this study) |
| TH32 | *unc-119(ed3) ruIs32[unc-119(+), pie-1p::gfp::his-11] III; ddIs6[unc-119(+), pie-1p::gfp::tbg-1] V* | (Oegema et al., 2001) |
| EU1395 | *rsa-1(or598) I; ruIs32 III; ddIs6 V* | (O'Rourke et al., 2011) |
| MAS287 | *rsa-1(or598) ska-1(abc17) I; ruIs32 III; ddIs6 V* | (this study) |
| MAS286 | *rsa-1(or598) ska-1(abc25) I; ruIs32 III; ddIs6 V* | (this study) |
| MAS299 | *ska-3(abc60) III; ddIs6 V* | (this study) |
| MAS314 | *ltIs37[(pAA64) pie-1p::mCherry::his-58 + unc-119(+)] IV; ddIs6 V* | (this study) |
| MAS300 | *rsa-1(or598) I; ska-3(abc60) III; ltIs37 IV; ddIs6 V* | (this study) |
| MAS311 | *ska-3(abc60) III; ltIs37 IV; ddIs6 V* | (this study) |
| MAS91 | *ltIs37 IV; ruIs57 [pie-1p::GFP::tbb-2, unc-119(+)]* | (Bajaj and Srayko, 2013) |
| MAS136 | *rsa-1(or598) I; ltIs37 IV; ruIs57* | (this study) |
| MAS253 | *rsa-1(or598) ska-1(abc17) I; ltIs37 IV; ruIs57* | (this study) |
| MAS248 | *rsa-1(or598) ska-1(abc25) I; ltIs37 IV; ruIs57* | (this study) |
| MAS263 | *rsa-1(or598) I; ska-3(abc60) III; ltIs37 IV; ruIs57* | (this study) |
| TH53 | *unc-119(ed3) III; ddIs12[unc-119(+), pie-1p::tpxl-1::gfp]* | (Hannak et al., 2002) |
| MAS229 | *rsa-1(or598) I; ddIs12* | (this study) |
| MAS15 | *unc-119(ed3) III; abcIs4[unc-119(+), pie-1p::klp-7::gfp]* | (Han et al., 2015) |
| OD650 | *ltSi428 [pDC159, ska-1p::ska-1::gfp, cb-unc-119(+)]II; unc-119(ed3) III* | (Cheerambathur et al., 2013) |
| MAS304 | *rsa-1(or598) I; ltSi428 [pDC159, ska-1p::ska-1::gfp, cb-unc-119(+)] II* | (this study) |
| OD142 | *unc-119(ed3) III; ltIs78* *[(pKO5) pie-1p::GFP::TEV::Stag::air-1*  *spliced coding + unc-119(+)]* | (Portier et al., 2007) |
| MAS258 | *ltIs78; bsIs20[pNP99: unc-119(+) ptbb-1::mCherry::tbb-2::tbb-2 UTR]* | (this study) |
